# Supplementary material for: From tameness to wariness: chemical recognition of snake predators by lizards in a Mediterranean island
Source: PeerJ. 2017 Jan 17;5:e2828. doi: 10.7717/peerj.2828 (PMC5244877; doi:10.7717/peerj.2828)
Supplement: Data S1 — The number of the lizard identify each individual within each population. [file peerj-05-2828-s001.xlsx]

## Sheet: Data predation Menorca
Population	Lizard number	Treatment	Walking latency	Walk	Ch. sectors	Slow	TF latency	TF	Snout	Rubbing	Stand and scr.	Head bob	Head rise	Foot shake	Head rise	Tail waving	Walk time	Slow time	No move
Podarcis lilfordi Aire	1	CONTROL	2	128	46	0	2	93	43	92	133	0	2	0	28	0	448	0	452
Podarcis lilfordi Aire	2	CONTROL	6	113	45	0	17	111	55	40	21	0	0	0	34	0	284	0	616
Podarcis lilfordi Aire	3	CONTROL	30	75	27	0	32	84	38	35	11	0	11	0	47	0	248	0	652
Podarcis lilfordi Aire	4	CONTROL	4	98	42	0	5	105	48	84	82	0	0	0	27	0	378	0	528
Podarcis lilfordi Aire	5	CONTROL	75	90	38	0	13	120	44	32	75	0	28	0	38	0	285	0	615
Podarcis lilfordi Aire	6	CONTROL	8	42	18	0	16	46	27	22	4	0	3	0	29	0	177	0	723
Podarcis lilfordi Aire	7	CONTROL	5	80	32	0	12	63	19	62	5	0	0	0	38	0	216	0	684
Podarcis lilfordi Aire	8	CONTROL	41	82	36	0	25	79	41	50	20	0	0	0	40	0	323	0	577
Podarcis lilfordi Aire	9	CONTROL	105	48	10	0	44	30	14	18	0	0	2	0	19	0	92	0	808
Podarcis lilfordi Aire	10	CONTROL	30	59	13	0	13	89	30	83	28	0	2	0	39	0	241	0	659
Podarcis lilfordi Aire	11	CONTROL	151	106	49	0	160	83	85	103	57	0	13	0	43	0	420	0	480
Podarcis lilfordi Aire	12	CONTROL	9	50	31	0	10	44	9	3	0	4	0	0	26	0	114	0	786
Podarcis lilfordi Aire	13	CONTROL	14	137	48	0	23	126	38	55	48	0	0	0	62	0	344	0	556
Podarcis lilfordi Aire	14	CONTROL	5	94	49	0	6	48	34	33	56	0	9	0	32	0	294	0	606
Podarcis lilfordi Aire	15	CONTROL	30	93	36	0	38	58	28	59	34	0	0	0	38	0	267	0	633
Podarcis lilfordi Aire	16	CONTROL	176	46	33	0	70	51	32	12	12	0	0	0	20	0	145	0	755
Podarcis lilfordi Aire	17	CONTROL	49	107	37	0	48	94	54	70	22	0	17	0	43	0	291	0	509
Podarcis lilfordi Aire	18	CONTROL	10	49	25	0	12	50	27	21	19	0	2	0	16	0	185	0	715
Podarcis lilfordi Aire	19	CONTROL	40	138	43	0	7	81	35	66	11	0	0	0	57	0	352	0	548
Podarcis lilfordi Aire	20	CONTROL	15	93	34	0	12	66	38	60	12	0	17	0	39	0	285	0	615
Podarcis lilfordi Aire	21	CONTROL	140	74	37	0	105	51	30	35	43	0	9	0	41	0	249	0	601
Podarcis lilfordi Aire	22	CONTROL	13	125	60	0	8	71	45	73	42	0	8	0	32	0	428	0	472
Podarcis lilfordi Aire	23	CONTROL	10	102	34	0	19	43	28	64	22	0	2	0	32	0	323	0	577
Podarcis lilfordi Aire	24	CONTROL	70	38	22	0	72	60	13	48	13	0	8	0	25	0	177	0	723
Podarcis lilfordi Aire	1	RHINECHIS	23	98	40	0	17	92	51	86	103	0	0	0	35	0	362	0	538
Podarcis lilfordi Aire	2	RHINECHIS	8	59	40	0	37	64	38	8	9	0	0	0	8	0	162	0	738
Podarcis lilfordi Aire	3	RHINECHIS	110	85	31	0	22	70	28	40	26	0	8	0	40	0	285	0	615
Podarcis lilfordi Aire	4	RHINECHIS	13	74	42	0	18	78	43	54	39	0	0	0	28	0	262	0	638
Podarcis lilfordi Aire	5	RHINECHIS	46	129	82	0	6	134	48	33	48	0	38	0	45	0	377	0	523
Podarcis lilfordi Aire	6	RHINECHIS	20	38	22	0	50	33	16	25	3	0	0	0	35	0	118	0	782
Podarcis lilfordi Aire	7	RHINECHIS	8	101	32	0	6	55	26	60	18	0	8	0	35	0	313	0	587
Podarcis lilfordi Aire	8	RHINECHIS	71	65	25	0	65	53	27	29	12	0	0	0	20	0	213	0	687
Podarcis lilfordi Aire	9	RHINECHIS	22	86	40	0	10	108	61	53	35	0	9	0	55	0	376	0	574
Podarcis lilfordi Aire	10	RHINECHIS	62	78	21	0	5	101	49	73	55	0	2	0	45	0	284	0	616
Podarcis lilfordi Aire	11	RHINECHIS	52	23	6	0	22	42	5	15	10	0	0	0	15	0	64	0	836
Podarcis lilfordi Aire	12	RHINECHIS	42	143	68	0	51	100	72	124	71	0	0	0	57	0	485	0	415
Podarcis lilfordi Aire	13	RHINECHIS	16	184	79	0	18	132	64	123	55	0	16	0	65	0	553	0	647
Podarcis lilfordi Aire	14	RHINECHIS	2	82	31	0	12	66	26	33	70	0	23	0	52	0	299	0	601
Podarcis lilfordi Aire	15	RHINECHIS	78	101	61	0	25	106	48	77	40	0	0	0	67	0	363	0	537
Podarcis lilfordi Aire	16	RHINECHIS	45	84	43	0	30	103	58	63	62	0	12	0	54	0	407	0	493
Podarcis lilfordi Aire	17	RHINECHIS	118	35	14	0	58	39	26	20	10	0	2	0	21	0	201	0	699
Podarcis lilfordi Aire	18	RHINECHIS	4	97	32	0	13	79	35	45	32	0	7	0	47	0	346	0	554
Podarcis lilfordi Aire	19	RHINECHIS	50	77	26	0	55	71	22	43	12	0	3	0	21	0	226	0	764
Podarcis lilfordi Aire	20	RHINECHIS	23	91	37	0	16	52	34	46	9	0	6	0	37	0	267	0	633
Podarcis lilfordi Aire	21	RHINECHIS	10	81	31	0	55	61	30	46	23	0	7	0	29	0	272	0	628
Podarcis lilfordi Aire	22	RHINECHIS	27	107	48	0	40	84	32	63	32	0	17	0	52	0	412	0	488
Podarcis lilfordi Aire	23	RHINECHIS	45	46	26	0	23	5	23	50	8	0	4	0	28	0	185	0	715
Podarcis lilfordi Aire	24	RHINECHIS	40	68	35	0	30	67	31	53	18	0	0	0	33	0	288	0	612
Podarcis lilfordi Aire	1	NATRIX	9	106	42	0	10	102	39	94	118	0	0	0	13	0	406	0	494
Podarcis lilfordi Aire	2	NATRIX	15	42	22	0	17	46	2	6	5	0	0	0	7	0	88	0	812
Podarcis lilfordi Aire	3	NATRIX	118	114	44	0	125	75	42	78	43	0	15	0	52	0	423	0	477
Podarcis lilfordi Aire	4	NATRIX	11	77	31	0	12	73	28	62	64	0	0	0	15	0	268	0	632
Podarcis lilfordi Aire	5	NATRIX	95	102	41	0	19	133	33	45	64	0	17	0	60	0	317	0	583
Podarcis lilfordi Aire	6	NATRIX	31	70	25	0	9	65	37	18	5	0	0	0	42	0	205	0	695
Podarcis lilfordi Aire	7	NATRIX	28	60	27	0	9	47	17	27	9	0	3	0	28	0	167	0	733
Podarcis lilfordi Aire	8	NATRIX	35	60	22	0	40	69	40	27	10	0	2	0	33	0	207	0	697
Podarcis lilfordi Aire	9	NATRIX	142	90	42	0	147	100	55	108	40	0	21	0	36	0	371	0	529
Podarcis lilfordi Aire	10	NATRIX	2	60	27	0	5	70	32	47	40	0	3	0	32	0	227	0	673
Podarcis lilfordi Aire	11	NATRIX	10	63	27	0	7	73	43	48	21	6	0	0	26	0	212	0	688
Podarcis lilfordi Aire	12	NATRIX	7	161	72	0	15	93	93	96	44	0	0	0	31	0	474	0	426
Podarcis lilfordi Aire	13	NATRIX	13	52	13	0	18	45	24	49	8	0	0	0	40	0	161	0	739
Podarcis lilfordi Aire	14	NATRIX	20	137	71	0	42	122	38	93	104	0	23	0	45	0	481	0	419
Podarcis lilfordi Aire	15	NATRIX	11	74	25	0	28	93	34	27	21	0	0	0	33	0	197	0	703
Podarcis lilfordi Aire	16	NATRIX	20	69	38	0	23	84	45	64	59	0	8	0	34	0	286	0	614
Podarcis lilfordi Aire	17	NATRIX	15	75	27	0	9	67	20	36	18	0	0	0	35	0	247	0	653
Podarcis lilfordi Aire	18	NATRIX	42	41	18	0	21	40	13	27	7	0	0	0	18	0	145	0	755
Podarcis lilfordi Aire	19	NATRIX	17	103	37	0	16	56	32	35	28	0	0	0	33	0	296	0	604
Podarcis lilfordi Aire	20	NATRIX	10	86	31	0	18	48	23	49	18	0	16	0	38	0	254	0	646
Podarcis lilfordi Aire	21	NATRIX	30	84	35	0	35	92	43	61	47	0	13	0	27	0	391	0	509
Podarcis lilfordi Aire	22	NATRIX	40	132	42	0	37	82	40	72	56	0	13	0	43	0	474	0	426
Podarcis lilfordi Aire	23	NATRIX	30	76	32	0	35	55	22	35	22	0	8	0	35	0	242	0	656
Podarcis lilfordi Aire	24	NATRIX	35	46	28	0	41	48	20	41	21	0	2	0	21	0	254	0	646
Podarcis lilfordi Aire	1	MACROPROTODON	31	113	41	0	4	87	43	98	93	0	0	0	27	0	398	0	502
Podarcis lilfordi Aire	2	MACROPROTODON	34	63	30	0	4	90	21	9	10	0	0	0	14	0	145	0	755
Podarcis lilfordi Aire	3	MACROPROTODON	72	73	28	0	18	52	17	31	7	0	9	0	32	0	200	0	700
Podarcis lilfordi Aire	4	MACROPROTODON	28	88	36	0	3	89	35	58	49	0	0	0	22	0	287	0	613
Podarcis lilfordi Aire	5	MACROPROTODON	122	105	37	0	120	140	39	40	71	0	44	0	57	0	358	0	542
Podarcis lilfordi Aire	6	MACROPROTODON	5	108	36	0	15	79	27	68	13	0	5	0	52	0	264	0	636
Podarcis lilfordi Aire	7	MACROPROTODON	5	55	21	0	5	39	16	28	7	0	2	0	32	0	173	0	727
Podarcis lilfordi Aire	8	MACROPROTODON	32	109	37	0	30	65	47	65	42	0	2	0	43	0	440	0	460
Podarcis lilfordi Aire	9	MACROPROTODON	98	98	41	0	53	85	68	62	38	0	10	0	40	0	323	0	577
Podarcis lilfordi Aire	10	MACROPROTODON	48	109	32	0	45	120	65	100	90	0	8	0	32	0	407	0	493
Podarcis lilfordi Aire	11	MACROPROTODON	5	94	23	0	2	88	29	39	38	0	2	0	32	0	233	0	667
Podarcis lilfordi Aire	12	MACROPROTODON	58	52	28	0	72	36	24	31	5	0	3	0	23	0	155	0	745
Podarcis lilfordi Aire	13	MACROPROTODON	28	123	43	0	20	33	20	82	21	0	8	0	37	0	315	0	585
Podarcis lilfordi Aire	14	MACROPROTODON	22	41	28	0	18	52	22	27	40	0	13	0	28	0	187	0	713
Podarcis lilfordi Aire	15	MACROPROTODON	39	93	31	0	37	91	27	34	23	0	21	0	26	0	194	0	706
Podarcis lilfordi Aire	16	MACROPROTODON	32	74	32	0	35	85	25	42	33	0	17	0	29	0	215	0	685
Podarcis lilfordi Aire	17	MACROPROTODON	4	67	26	0	3	47	32	34	11	0	5	0	41	0	255	0	645
Podarcis lilfordi Aire	18	MACROPROTODON	10	37	17	0	8	32	16	18	18	0	3	0	21	0	181	0	719
Podarcis lilfordi Aire	19	MACROPROTODON	10	55	22	0	39	36	17	32	6	0	0	0	14	0	162	0	738
Podarcis lilfordi Aire	20	MACROPROTODON	44	104	42	0	38	70	34	64	12	0	9	0	47	0	316	0	584
Podarcis lilfordi Aire	21	MACROPROTODON	95	57	32	0	5	58	28	33	29	0	10	0	27	0	199	0	701
Podarcis lilfordi Aire	22	MACROPROTODON	12	112	33	0	10	74	23	50	55	0	14	0	41	0	355	0	545
Podarcis lilfordi Aire	23	MACROPROTODON	25	77	25	0	56	67	32	47	28	0	10	0	28	0	295	0	605
Podarcis lilfordi Aire	24	MACROPROTODON	120	68	30	0	110	49	13	27	18	0	3	0	17	0	194	0	706
Podarcis lilfordi Binicodrell	1	CONTROL	21	57	16	0	2	54	10	24	18	0	0	0	9	0	138	0	762
Podarcis lilfordi Binicodrell	2	CONTROL	65	32	15	0	24	29	1	4	3	0	0	0	13	0	65	0	835
Podarcis lilfordi Binicodrell	3	CONTROL	58	54	16	0	16	57	13	19	2	0	1	0	5	0	110	0	790
Podarcis lilfordi Binicodrell	4	CONTROL	21	41	17	0	25	55	13	5	0	0	0	0	5	0	90	0	810
Podarcis lilfordi Binicodrell	5	CONTROL	47	54	18	0	49	56	6	2	0	0	0	0	6	0	80	0	820
Podarcis lilfordi Binicodrell	6	CONTROL	50	57	24	0	42	75	10	5	3	0	0	0	5	0	99	0	801
Podarcis lilfordi Binicodrell	7	CONTROL	97	49	17	0	14	75	13	6	4	0	0	0	4	0	92	0	808
Podarcis lilfordi Binicodrell	8	CONTROL	44	112	47	0	6	53	47	60	26	0	1	0	16	0	280	0	620
Podarcis lilfordi Binicodrell	9	CONTROL	5	83	47	0	7	65	43	45	28	0	0	0	31	0	214	0	686
Podarcis lilfordi Binicodrell	10	CONTROL	100	53	14	0	14	60	13	6	5	0	0	0	16	0	94	0	806
Podarcis lilfordi Binicodrell	11	CONTROL	65	68	24	0	3	106	18	14	8	0	0	0	23	0	135	0	765
Podarcis lilfordi Binicodrell	12	CONTROL	58	80	42	0	60	116	36	23	11	0	0	0	36	0	182	0	718
Podarcis lilfordi Binicodrell	13	CONTROL	34	116	58	0	21	126	27	56	109	0	0	0	31	0	472	0	428
Podarcis lilfordi Binicodrell	14	CONTROL	72	41	24	0	74	29	8	5	6	0	0	0	2	0	106	0	794
Podarcis lilfordi Binicodrell	15	CONTROL	67	110	54	0	37	82	13	4	6	0	0	0	12	0	201	0	699
Podarcis lilfordi Binicodrell	16	CONTROL	22	56	17	0	25	51	14	8	10	0	1	0	11	0	105	0	795
Podarcis lilfordi Binicodrell	17	CONTROL	46	47	21	0	48	54	13	17	12	0	0	0	5	0	141	0	759
Podarcis lilfordi Binicodrell	18	CONTROL	36	220	77	0	4	107	83	137	109	0	9	0	43	0	648	0	252
Podarcis lilfordi Binicodrell	19	CONTROL	45	71	31	0	27	65	18	31	20	0	1	0	23	0	210	0	690
Podarcis lilfordi Binicodrell	20	CONTROL	18	58	21	0	16	53	19	31	6	0	0	0	23	0	217	0	683
Podarcis lilfordi Binicodrell	21	CONTROL	128	77	19	0	38	57	17	22	6	0	0	1	22	0	177	0	732
Podarcis lilfordi Binicodrell	22	CONTROL	10	65	27	0	51	67	41	21	8	0	0	0	8	0	264	0	636
Podarcis lilfordi Binicodrell	23	CONTROL	120	37	20	0	120	37	8	15	3	0	0	0	13	0	109	0	761
Podarcis lilfordi Binicodrell	24	CONTROL	41	62	21	0	12	61	19	32	7	0	0	0	19	0	184	0	716
Podarcis lilfordi Binicodrell	1	RHINECHIS	68	128	55	0	52	83	17	25	18	0	0	0	34	0	235	0	665
Podarcis lilfordi Binicodrell	2	RHINECHIS	9	14	5	0	181	18	5	5	2	0	0	0	3	0	33	0	887
Podarcis lilfordi Binicodrell	3	RHINECHIS	3	139	68	0	12	68	37	62	17	0	0	0	35	0	303	0	597
Podarcis lilfordi Binicodrell	4	RHINECHIS	40	56	21	0	42	72	24	9	0	0	1	0	2	0	116	0	784
Podarcis lilfordi Binicodrell	5	RHINECHIS	25	81	35	0	32	109	18	25	3	0	0	0	0	0	190	0	710
Podarcis lilfordi Binicodrell	6	RHINECHIS	301	9	6	0	13	19	4	2	0	0	0	0	5	0	19	0	881
Podarcis lilfordi Binicodrell	7	RHINECHIS	50	35	9	0	52	75	23	8	0	0	0	0	5	0	78	0	822
Podarcis lilfordi Binicodrell	8	RHINECHIS	27	40	19	0	15	53	12	5	11	0	0	0	6	0	92	0	808
Podarcis lilfordi Binicodrell	9	RHINECHIS	13	103	41	0	5	62	38	53	58	0	0	0	49	0	332	0	568
Podarcis lilfordi Binicodrell	10	RHINECHIS	20	82	35	0	13	43	17	17	2	0	0	0	12	0	139	0	761
Podarcis lilfordi Binicodrell	11	RHINECHIS	98	68	37	0	74	54	23	26	13	0	1	0	18	0	158	0	742
Podarcis lilfordi Binicodrell	12	RHINECHIS	24	50	23	0	13	57	13	7	30	0	0	0	32	0	175	0	725
Podarcis lilfordi Binicodrell	13	RHINECHIS	75	52	24	0	109	61	8	3	14	0	0	0	7	0	129	0	771
Podarcis lilfordi Binicodrell	14	RHINECHIS	37	185	89	0	35	121	35	14	0	0	1	0	10	0	342	0	557
Podarcis lilfordi Binicodrell	15	RHINECHIS	368	19	10	0	99	34	10	5	2	0	0	0	2	0	55	0	845
Podarcis lilfordi Binicodrell	16	RHINECHIS	58	103	47	0	60	58	38	22	28	0	0	0	18	0	260	0	640
Podarcis lilfordi Binicodrell	17	RHINECHIS	36	94	43	0	42	59	33	15	3	0	0	0	7	0	210	0	690
Podarcis lilfordi Binicodrell	18	RHINECHIS	24	92	34	0	26	75	53	32	21	0	5	0	12	0	234	0	666
Podarcis lilfordi Binicodrell	19	RHINECHIS	41	68	23	0	18	60	18	40	15	0	0	0	28	0	240	0	660
Podarcis lilfordi Binicodrell	20	RHINECHIS	13	69	24	0	22	51	28	36	19	0	0	0	40	0	248	0	652
Podarcis lilfordi Binicodrell	21	RHINECHIS	67	51	31	0	68	31	23	35	5	0	0	0	24	0	173	0	727
Podarcis lilfordi Binicodrell	22	RHINECHIS	27	47	20	0	7	44	21	25	28	0	0	0	12	0	231	0	669
Podarcis lilfordi Binicodrell	23	RHINECHIS	48	35	20	0	3	42	20	36	13	0	0	0	12	0	167	0	733
Podarcis lilfordi Binicodrell	24	RHINECHIS	36	47	20	0	31	46	28	21	8	0	0	0	13	0	112	0	788
Podarcis lilfordi Binicodrell	1	NATRIX	55	77	36	0	29	106	14	30	0	0	0	0	2	0	139	0	761
Podarcis lilfordi Binicodrell	2	NATRIX	27	75	56	0	25	79	26	9	1	0	0	0	20	0	142	0	758
Podarcis lilfordi Binicodrell	3	NATRIX	70	51	17	0	7	47	12	15	9	0	0	0	15	0	90	0	810
Podarcis lilfordi Binicodrell	4	NATRIX	16	78	32	0	1	110	20	17	0	0	0	0	9	0	147	0	753
Podarcis lilfordi Binicodrell	5	NATRIX	80	47	21	0	17	99	25	28	5	0	1	0	8	0	130	0	770
Podarcis lilfordi Binicodrell	6	NATRIX	180	22	11	0	129	43	0	0	0	0	0	0	5	0	42	0	858
Podarcis lilfordi Binicodrell	7	NATRIX	97	27	14	0	14	60	2	5	0	0	0	0	1	0	71	0	829
Podarcis lilfordi Binicodrell	8	NATRIX	33	105	24	0	35	103	39	33	5	0	0	0	3	0	222	0	778
Podarcis lilfordi Binicodrell	9	NATRIX	17	126	53	0	15	65	23	42	50	0	0	0	28	0	277	0	623
Podarcis lilfordi Binicodrell	10	NATRIX	45	37	23	0	51	50	12	17	8	0	1	0	16	0	85	0	815
Podarcis lilfordi Binicodrell	11	NATRIX	104	49	26	0	100	58	14	20	10	0	1	0	23	0	94	0	806
Podarcis lilfordi Binicodrell	12	NATRIX	94	83	31	0	7	90	42	31	28	0	0	0	28	0	195	0	705
Podarcis lilfordi Binicodrell	13	NATRIX	92	40	8	0	95	47	9	8	23	0	0	0	5	0	102	0	798
Podarcis lilfordi Binicodrell	14	NATRIX	14	101	44	0	4	109	54	29	43	0	0	0	22	0	328	0	572
Podarcis lilfordi Binicodrell	15	NATRIX	90	32	17	0	11	53	9	11	5	0	0	0	6	0	83	0	817
Podarcis lilfordi Binicodrell	16	NATRIX	16	58	20	0	18	31	11	17	38	0	0	0	17	0	181	0	719
Podarcis lilfordi Binicodrell	17	NATRIX	15	76	35	0	13	64	29	16	32	0	0	0	14	0	207	0	693
Podarcis lilfordi Binicodrell	18	NATRIX	72	96	33	0	9	85	24	32	18	0	3	0	14	0	234	0	666
Podarcis lilfordi Binicodrell	19	NATRIX	35	141	53	0	20	88	25	40	23	0	1	0	21	0	380	0	520
Podarcis lilfordi Binicodrell	20	NATRIX	10	66	30	0	10	41	33	38	16	0	1	1	39	0	205	0	695
Podarcis lilfordi Binicodrell	21	NATRIX	40	74	27	0	11	57	28	17	23	0	0	1	37	0	245	0	655
Podarcis lilfordi Binicodrell	22	NATRIX	87	68	23	0	80	75	19	17	4	0	0	2	18	0	207	0	693
Podarcis lilfordi Binicodrell	23	NATRIX	140	54	23	0	125	42	15	19	8	0	0	0	16	0	190	0	710
Podarcis lilfordi Binicodrell	24	NATRIX	36	69	28	0	30	63	30	45	19	0	2	0	18	0	267	0	633
Podarcis lilfordi Binicodrell	1	MACROPROTODON	75	94	50	0	71	86	13	36	6	0	0	0	18	0	190	0	710
Podarcis lilfordi Binicodrell	2	MACROPROTODON	93	16	10	0	96	43	7	1	2	0	0	0	7	0	43	0	856
Podarcis lilfordi Binicodrell	3	MACROPROTODON	42	108	55	0	31	129	53	55	3	0	0	0	12	0	271	0	629
Podarcis lilfordi Binicodrell	4	MACROPROTODON	28	153	53	0	16	130	50	111	11	0	0	0	19	0	378	0	522
Podarcis lilfordi Binicodrell	5	MACROPROTODON	37	25	8	0	35	55	13	10	0	0	1	0	11	0	61	0	839
Podarcis lilfordi Binicodrell	6	MACROPROTODON	53	41	28	0	51	73	21	7	4	0	0	0	14	0	116	0	784
Podarcis lilfordi Binicodrell	7	MACROPROTODON	60	56	25	0	12	60	23	16	0	0	0	0	6	0	139	0	761
Podarcis lilfordi Binicodrell	8	MACROPROTODON	22	139	63	0	12	63	50	60	0	0	0	0	41	0	308	0	592
Podarcis lilfordi Binicodrell	9	MACROPROTODON	6	60	36	0	8	123	59	62	27	0	0	0	16	0	253	0	647
Podarcis lilfordi Binicodrell	10	MACROPROTODON	23	110	51	0	25	42	35	45	17	0	0	0	13	0	264	0	636
Podarcis lilfordi Binicodrell	11	MACROPROTODON	44	42	16	0	32	63	13	6	0	0	0	0	8	0	84	0	816
Podarcis lilfordi Binicodrell	12	MACROPROTODON	25	108	58	0	13	87	43	43	28	0	2	0	53	0	298	0	602
Podarcis lilfordi Binicodrell	13	MACROPROTODON	152	31	8	0	165	54	6	8	15	0	0	0	4	0	93	0	807
Podarcis lilfordi Binicodrell	14	MACROPROTODON	8	102	56	0	6	44	31	28	31	0	3	0	22	0	278	0	622
Podarcis lilfordi Binicodrell	15	MACROPROTODON	60	76	34	0	4	97	33	67	0	0	5	0	13	0	259	0	641
Podarcis lilfordi Binicodrell	16	MACROPROTODON	47	136	41	0	45	86	43	22	23	0	1	0	31	0	207	0	693
Podarcis lilfordi Binicodrell	17	MACROPROTODON	28	78	36	0	25	89	35	28	8	0	4	0	19	0	191	0	709
Podarcis lilfordi Binicodrell	18	MACROPROTODON	30	118	52	0	31	68	37	52	17	0	23	0	28	0	325	0	575
Podarcis lilfordi Binicodrell	19	MACROPROTODON	29	32	13	0	21	55	9	3	9	0	2	0	14	0	90	0	810
Podarcis lilfordi Binicodrell	20	MACROPROTODON	29	115	46	0	17	61	32	32	19	0	0	0	33	0	335	0	565
Podarcis lilfordi Binicodrell	21	MACROPROTODON	38	93	31	0	47	56	32	31	13	0	0	0	21	0	252	0	648
Podarcis lilfordi Binicodrell	22	MACROPROTODON	55	37	18	0	57	27	12	16	6	0	0	1	10	0	135	0	765
Podarcis lilfordi Binicodrell	23	MACROPROTODON	100	55	21	0	60	32	18	21	7	0	0	0	15	0	164	0	736
Podarcis lilfordi Binicodrell	24	MACROPROTODON	68	72	22	0	58	56	28	22	8	0	0	0	16	0	188	0	712
Podarcis lilfordi Colom	1	CONTROL	47	43	16	0	71	48	11	15	10	0	0	0	16	0	137	0	763
Podarcis lilfordi Colom	2	CONTROL	17	118	44	0	10	88	58	93	102	0	0	0	46	0	427	0	473
Podarcis lilfordi Colom	3	CONTROL	13	119	66	0	2	81	47	88	41	0	0	0	38	0	376	0	524
Podarcis lilfordi Colom	4	CONTROL	37	206	72	0	8	113	52	76	57	0	0	0	39	0	479	0	721
Podarcis lilfordi Colom	5	CONTROL	25	106	46	0	53	84	15	18	8	0	0	0	35	0	199	0	701
Podarcis lilfordi Colom	6	CONTROL	23	120	54	0	18	104	58	98	63	0	0	0	36	0	394	0	506
Podarcis lilfordi Colom	7	CONTROL	22	126	65	0	50	85	37	113	109	0	0	0	51	0	374	0	426
Podarcis lilfordi Colom	8	CONTROL	57	90	33	0	12	109	28	36	44	0	0	0	47	0	270	0	630
Podarcis lilfordi Colom	9	CONTROL	28	78	41	0	29	82	22	30	24	0	0	0	32	0	211	0	789
Podarcis lilfordi Colom	10	CONTROL	21	108	46	0	23	138	27	123	167	0	0	0	43	0	485	0	415
Podarcis lilfordi Colom	11	CONTROL	24	84	45	0	18	88	33	41	56	0	0	0	46	0	264	0	636
Podarcis lilfordi Colom	12	CONTROL	14	46	16	0	31	60	21	34	30	0	0	0	17	0	163	0	737
Podarcis lilfordi Colom	13	CONTROL	37	82	41	0	39	88	31	61	28	0	0	0	17	0	266	0	634
Podarcis lilfordi Colom	14	CONTROL	14	86	31	0	36	69	47	42	31	0	0	0	37	0	254	0	646
Podarcis lilfordi Colom	15	CONTROL	20	84	33	0	22	73	43	47	25	0	0	0	19	0	257	0	643
Podarcis lilfordi Colom	16	CONTROL	35	73	28	0	33	121	28	47	0	0	0	0	32	0	160	0	740
Podarcis lilfordi Colom	17	CONTROL	25	94	34	0	8	106	38	56	12	0	0	0	23	0	247	0	653
Podarcis lilfordi Colom	18	CONTROL	41	85	29	0	7	121	23	3	0	0	0	0	29	0	180	0	720
Podarcis lilfordi Colom	19	CONTROL	11	103	57	0	21	113	48	62	53	0	0	0	33	0	341	0	559
Podarcis lilfordi Colom	20	CONTROL	9	118	53	0	27	103	59	49	12	0	0	0	59	0	287	0	613
Podarcis lilfordi Colom	21	CONTROL	42	76	33	0	39	98	33	47	9	0	0	0	28	0	203	0	697
Podarcis lilfordi Colom	22	CONTROL	8	94	31	0	10	90	32	47	13	0	4	0	41	0	274	0	636
Podarcis lilfordi Colom	23	CONTROL	11	38	16	0	11	34	8	12	6	0	0	0	22	0	106	0	794
Podarcis lilfordi Colom	24	CONTROL	24	64	28	0	10	59	19	39	6	0	0	0	32	0	169	0	731
Podarcis lilfordi Colom	1	RHINECHIS	16	99	51	0	6	94	35	38	45	0	0	0	63	0	282	0	614
Podarcis lilfordi Colom	2	RHINECHIS	26	181	68	0	10	81	58	70	75	0	0	0	41	0	472	0	428
Podarcis lilfordi Colom	3	RHINECHIS	85	131	66	0	57	97	51	73	76	0	0	0	56	0	407	0	493
Podarcis lilfordi Colom	4	RHINECHIS	42	118	52	0	46	48	32	57	82	0	0	0	39	0	353	0	547
Podarcis lilfordi Colom	5	RHINECHIS	80	59	31	0	123	45	3	4	12	0	0	0	25	0	117	0	783
Podarcis lilfordi Colom	6	RHINECHIS	37	122	61	0	28	83	56	74	62	0	0	0	45	0	424	0	466
Podarcis lilfordi Colom	7	RHINECHIS	22	95	52	0	17	88	58	61	177	0	0	0	49	0	460	0	440
Podarcis lilfordi Colom	8	RHINECHIS	15	109	52	0	2	133	45	49	56	0	0	0	43	0	346	0	554
Podarcis lilfordi Colom	9	RHINECHIS	11	80	32	0	4	61	51	54	33	0	0	0	38	0	294	0	584
Podarcis lilfordi Colom	10	RHINECHIS	42	88	41	0	1	98	38	69	87	0	0	0	21	0	342	0	558
Podarcis lilfordi Colom	11	RHINECHIS	17	89	44	0	25	81	43	73	65	0	0	0	45	0	313	0	587
Podarcis lilfordi Colom	12	RHINECHIS	56	50	19	0	55	68	11	51	10	0	0	0	20	0	144	0	756
Podarcis lilfordi Colom	13	RHINECHIS	22	83	42	0	23	122	54	62	53	0	0	0	32	0	261	0	739
Podarcis lilfordi Colom	14	RHINECHIS	48	99	30	0	27	98	38	62	33	0	0	0	22	0	240	0	660
Podarcis lilfordi Colom	15	RHINECHIS	22	82	34	0	17	105	51	64	29	0	0	0	35	0	285	0	615
Podarcis lilfordi Colom	16	RHINECHIS	30	103	34	0	32	96	34	45	0	0	0	0	29	0	239	0	661
Podarcis lilfordi Colom	17	RHINECHIS	27	97	32	0	29	91	32	47	12	0	0	0	25	0	243	0	657
Podarcis lilfordi Colom	18	RHINECHIS	7	72	24	0	19	103	39	14	0	0	0	0	24	0	176	0	724
Podarcis lilfordi Colom	19	RHINECHIS	30	107	39	0	28	93	28	53	28	0	0	0	29	0	271	0	629
Podarcis lilfordi Colom	20	RHINECHIS	15	73	43	0	27	93	39	29	5	0	1	0	48	0	204	0	696
Podarcis lilfordi Colom	21	RHINECHIS	10	65	37	0	19	95	51	33	28	0	0	0	45	0	232	0	668
Podarcis lilfordi Colom	22	RHINECHIS	21	79	32	0	17	61	33	55	18	0	2	0	37	0	246	0	654
Podarcis lilfordi Colom	23	RHINECHIS	23	36	12	0	26	53	8	15	4	0	6	0	17	0	106	0	794
Podarcis lilfordi Colom	24	RHINECHIS	103	48	23	0	38	39	31	26	17	0	0	0	26	0	179	0	721
Podarcis lilfordi Colom	1	NATRIX	21	142	48	0	18	172	76	93	43	0	0	0	72	0	423	0	477
Podarcis lilfordi Colom	2	NATRIX	63	57	37	0	65	51	13	7	29	0	1	0	18	0	152	0	748
Podarcis lilfordi Colom	3	NATRIX	78	129	52	0	19	72	48	92	50	0	0	0	47	0	405	0	495
Podarcis lilfordi Colom	4	NATRIX	49	157	66	0	45	104	51	86	48	0	0	0	37	0	423	0	477
Podarcis lilfordi Colom	5	NATRIX	151	103	72	0	130	80	27	26	28	0	0	0	26	0	276	0	624
Podarcis lilfordi Colom	6	NATRIX	53	114	48	0	47	82	43	76	38	0	0	0	39	0	333	0	567
Podarcis lilfordi Colom	7	NATRIX	14	156	96	0	6	107	78	77	173	0	0	0	47	0	397	0	507
Podarcis lilfordi Colom	8	NATRIX	33	71	26	0	13	75	28	43	18	0	0	0	50	0	190	0	710
Podarcis lilfordi Colom	9	NATRIX	54	97	58	0	26	60	28	38	89	0	0	0	33	0	312	0	588
Podarcis lilfordi Colom	10	NATRIX	20	123	58	0	2	129	72	48	10	0	0	0	36	0	454	0	446
Podarcis lilfordi Colom	11	NATRIX	29	108	52	0	15	111	38	47	110	0	0	0	36	0	188	0	712
Podarcis lilfordi Colom	12	NATRIX	8	81	46	0	32	88	36	56	47	0	0	0	37	0	331	0	569
Podarcis lilfordi Colom	13	NATRIX	12	53	19	0	15	89	37	62	46	0	0	0	22	0	223	0	677
Podarcis lilfordi Colom	14	NATRIX	25	109	42	0	28	138	66	84	53	0	0	0	12	0	293	0	507
Podarcis lilfordi Colom	15	NATRIX	18	82	39	0	22	91	54	58	43	0	0	0	19	0	303	0	597
Podarcis lilfordi Colom	16	NATRIX	49	91	31	0	22	124	44	26	0	0	0	0	45	0	112	0	688
Podarcis lilfordi Colom	17	NATRIX	15	73	32	0	30	74	48	23	19	0	0	0	33	0	225	0	675
Podarcis lilfordi Colom	18	NATRIX	14	68	27	0	18	84	29	17	14	0	0	0	19	0	185	0	715
Podarcis lilfordi Colom	19	NATRIX	10	119	31	0	63	98	53	78	38	0	0	0	34	0	337	0	563
Podarcis lilfordi Colom	20	NATRIX	28	124	53	0	30	129	33	37	23	0	0	0	59	0	285	0	615
Podarcis lilfordi Colom	21	NATRIX	17	94	51	0	24	105	38	47	13	0	0	0	55	0	156	0	746
Podarcis lilfordi Colom	22	NATRIX	26	80	30	0	12	60	42	67	32	0	0	0	30	0	353	0	557
Podarcis lilfordi Colom	23	NATRIX	21	56	17	0	20	62	17	21	7	0	0	0	27	0	239	0	661
Podarcis lilfordi Colom	24	NATRIX	55	61	22	0	54	46	27	35	12	0	2	0	36	0	190	0	710
Podarcis lilfordi Colom	1	MACROPROTODON	26	109	50	0	3	125	38	52	44	0	1	0	47	0	310	0	590
Podarcis lilfordi Colom	2	MACROPROTODON	32	78	35	0	77	35	29	54	52	0	0	0	20	0	257	0	643
Podarcis lilfordi Colom	3	MACROPROTODON	19	116	56	0	19	72	68	89	38	0	0	0	27	0	382	0	518
Podarcis lilfordi Colom	4	MACROPROTODON	25	158	61	0	44	53	50	58	26	0	0	0	30	0	355	0	545
Podarcis lilfordi Colom	5	MACROPROTODON	85	105	51	0	115	44	41	44	23	0	0	0	26	0	280	0	620
Podarcis lilfordi Colom	6	MACROPROTODON	21	97	49	0	35	56	42	73	39	0	0	0	25	0	315	0	585
Podarcis lilfordi Colom	7	MACROPROTODON	27	147	57	0	10	72	43	128	156	0	0	0	49	0	543	0	357
Podarcis lilfordi Colom	8	MACROPROTODON	27	69	34	0	27	74	27	41	17	0	0	0	31	0	190	0	710
Podarcis lilfordi Colom	9	MACROPROTODON	86	74	49	0	84	54	16	48	25	0	0	0	29	0	190	0	710
Podarcis lilfordi Colom	10	MACROPROTODON	20	86	36	0	21	82	38	52	173	0	0	0	43	0	404	0	496
Podarcis lilfordi Colom	11	MACROPROTODON	25	88	38	0	28	84	25	62	37	0	0	0	39	0	235	0	665
Podarcis lilfordi Colom	12	MACROPROTODON	65	66	33	0	15	68	16	31	44	0	0	0	27	0	140	0	760
Podarcis lilfordi Colom	13	MACROPROTODON	32	114	49	0	33	87	49	78	48	0	0	0	22	0	347	0	553
Podarcis lilfordi Colom	14	MACROPROTODON	28	93	47	0	32	100	69	73	66	0	0	0	35	0	364	0	536
Podarcis lilfordi Colom	15	MACROPROTODON	30	96	45	0	31	93	57	72	58	0	0	0	28	0	322	0	578
Podarcis lilfordi Colom	16	MACROPROTODON	57	73	21	0	16	73	19	23	5	0	0	0	21	0	179	0	721
Podarcis lilfordi Colom	17	MACROPROTODON	27	78	29	0	29	105	39	48	25	0	0	0	30	0	225	0	675
Podarcis lilfordi Colom	18	MACROPROTODON	13	78	19	0	12	113	40	24	0	0	0	0	26	0	176	0	724
Podarcis lilfordi Colom	19	MACROPROTODON	38	98	48	0	31	137	27	97	49	0	0	0	37	0	346	0	554
Podarcis lilfordi Colom	20	MACROPROTODON	17	76	30	0	19	87	38	26	13	0	0	0	36	0	199	0	701
Podarcis lilfordi Colom	21	MACROPROTODON	12	75	34	0	15	99	46	54	10	0	0	0	39	0	236	0	664
Podarcis lilfordi Colom	22	MACROPROTODON	9	79	34	0	6	65	31	45	23	0	0	0	42	0	220	0	680
Podarcis lilfordi Colom	23	MACROPROTODON	28	59	20	0	18	43	18	27	10	0	0	0	39	0	169	0	731
Podarcis lilfordi Colom	24	MACROPROTODON	27	87	40	0	14	77	40	68	24	0	0	0	45	0	383	0	627
Scelarcis perspicillata	1	CONTROL	45	6	3	0	42	7	3	0	1	0	0	0	7	0	24	0	876
Scelarcis perspicillata	2	CONTROL	208	28	14	0	170	11	8	13	2	0	0	0	22	0	70	0	830
Scelarcis perspicillata	3	CONTROL	6	33	7	0	57	13	4	0	26	0	0	0	9	0	85	0	815
Scelarcis perspicillata	4	CONTROL	15	19	7	0	35	5	4	10	14	0	0	0	10	0	63	0	837
Scelarcis perspicillata	5	CONTROL	22	46	13	0	102	24	6	37	44	0	0	0	21	0	257	0	643
Scelarcis perspicillata	6	CONTROL	37	34	16	0	25	15	6	3	12	0	0	0	19	0	90	0	810
Scelarcis perspicillata	7	CONTROL	315	14	4	0	318	7	2	3	1	0	0	0	9	0	44	0	856
Scelarcis perspicillata	8	CONTROL	12	30	12	0	24	20	3	6	12	0	0	0	4	0	82	0	818
Scelarcis perspicillata	9	CONTROL	28	24	3	0	22	31	5	12	13	0	0	0	8	0	85	0	815
Scelarcis perspicillata	10	CONTROL	9	4	3	0	12	2	1	1	2	0	0	0	3	0	27	0	873
Scelarcis perspicillata	11	CONTROL	49	8	6	0	35	6	2	4	2	0	0	0	7	0	27	0	873
Scelarcis perspicillata	12	CONTROL	111	10	4	0	102	7	1	1	1	0	0	0	11	0	34	0	866
Scelarcis perspicillata	13	CONTROL	51	16	8	0	65	9	8	4	4	0	0	0	13	0	103	0	797
Scelarcis perspicillata	14	CONTROL	40	42	27	0	39	20	5	25	17	0	0	0	35	0	250	0	650
Scelarcis perspicillata	15	CONTROL	8	11	5	0	13	2	0	0	0	0	0	0	8	0	30	0	870
Scelarcis perspicillata	16	CONTROL	70	30	18	0	78	14	3	17	10	0	0	0	20	0	141	0	759
Scelarcis perspicillata	17	CONTROL	29	7	4	0	37	4	0	1	0	0	0	0	5	0	19	0	881
Scelarcis perspicillata	18	CONTROL	31	8	4	0	50	3	2	1	1	0	0	0	4	0	18	0	882
Scelarcis perspicillata	19	CONTROL	14	33	13	0	5	8	7	10	12	0	0	0	23	0	195	0	705
Scelarcis perspicillata	20	CONTROL	35	8	5	0	30	4	4	1	4	0	0	0	3	0	50	0	850
Scelarcis perspicillata	21	CONTROL	14	37	13	0	50	21	8	3	4	0	0	0	20	0	110	0	790
Scelarcis perspicillata	22	CONTROL	13	16	8	0	30	16	6	7	4	0	0	0	13	0	99	0	801
Scelarcis perspicillata	23	CONTROL	4	27	12	0	14	14	4	3	7	0	0	0	23	0	98	0	802
Scelarcis perspicillata	24	CONTROL	40	8	3	0	35	2	1	0	0	0	0	0	3	0	10	0	890
Scelarcis perspicillata	1	RHINECHIS	3	6	2	0	9	8	3	1	3	0	0	0	3	0	20	0	880
Scelarcis perspicillata	2	RHINECHIS	43	43	25	0	30	12	3	28	10	0	0	0	18	0	235	0	665
Scelarcis perspicillata	3	RHINECHIS	50	24	11	0	54	14	3	8	7	0	0	0	15	0	72	0	825
Scelarcis perspicillata	4	RHINECHIS	390	33	13	0	180	15	4	17	8	0	0	0	18	0	139	0	761
Scelarcis perspicillata	5	RHINECHIS	41	8	6	0	48	5	1	1	2	0	0	0	5	0	16	0	884
Scelarcis perspicillata	6	RHINECHIS	4	4	2	0	4	17	0	0	0	0	0	0	3	0	15	0	885
Scelarcis perspicillata	7	RHINECHIS	8	6	5	0	12	5	3	5	4	0	0	0	5	0	40	0	860
Scelarcis perspicillata	8	RHINECHIS	176	30	15	0	215	9	4	4	11	0	0	0	15	0	120	0	780
Scelarcis perspicillata	9	RHINECHIS	15	65	26	0	45	24	14	19	31	0	0	0	47	0	162	0	736
Scelarcis perspicillata	10	RHINECHIS	65	33	9	0	72	21	5	45	22	0	0	0	20	0	126	0	774
Scelarcis perspicillata	11	RHINECHIS	17	15	5	0	25	3	1	1	3	0	0	0	7	0	42	0	858
Scelarcis perspicillata	12	RHINECHIS	82	17	7	0	84	5	8	0	14	0	0	0	9	0	57	0	843
Scelarcis perspicillata	13	RHINECHIS	209	10	5	0	198	12	2	0	1	0	0	0	4	0	19	0	881
Scelarcis perspicillata	14	RHINECHIS	9	17	7	0	12	17	10	0	24	0	0	0	8	0	69	0	831
Scelarcis perspicillata	15	RHINECHIS	100	7	3	0	98	2	0	0	0	0	0	0	7	0	21	0	879
Scelarcis perspicillata	16	RHINECHIS	31	15	4	0	38	5	2	2	2	0	0	0	11	0	31	0	869
Scelarcis perspicillata	17	RHINECHIS	28	20	13	0	20	7	1	2	0	0	0	0	12	0	90	0	810
Scelarcis perspicillata	18	RHINECHIS	5	23	9	0	65	16	2	4	13	0	0	0	19	0	90	0	810
Scelarcis perspicillata	19	RHINECHIS	80	25	11	0	72	19	3	6	4	0	0	0	22	0	102	0	798
Scelarcis perspicillata	20	RHINECHIS	102	5	4	0	95	4	1	0	0	0	0	0	2	0	22	0	878
Scelarcis perspicillata	21	RHINECHIS	44	47	19	0	40	9	5	2	21	0	0	0	30	0	150	0	750
Scelarcis perspicillata	22	RHINECHIS	21	8	4	0	18	7	2	3	2	0	0	0	3	0	20	0	880
Scelarcis perspicillata	23	RHINECHIS	7	23	8	0	15	7	1	1	3	0	0	0	21	0	114	0	786
Scelarcis perspicillata	24	RHINECHIS	5	72	26	0	35	24	9	6	31	0	0	0	45	0	200	0	700
Scelarcis perspicillata	1	NATRIX	501	25	9	0	495	5	1	2	8	0	0	0	8	0	53	0	847
Scelarcis perspicillata	2	NATRIX	3	77	19	0	38	21	12	23	37	0	0	0	41	0	203	0	697
Scelarcis perspicillata	3	NATRIX	91	11	3	0	98	6	4	3	5	0	0	0	5	0	41	0	859
Scelarcis perspicillata	4	NATRIX	240	36	12	0	285	5	2	0	5	0	0	0	20	0	72	0	828
Scelarcis perspicillata	5	NATRIX	3	33	14	0	22	34	11	3	43	0	0	0	14	0	179	0	721
Scelarcis perspicillata	6	NATRIX	5	36	29	0	7	13	9	10	30	0	0	7	19	0	203	0	697
Scelarcis perspicillata	7	NATRIX	19	21	6	0	118	43	9	40	5	0	0	0	21	0	77	0	823
Scelarcis perspicillata	8	NATRIX	8	10	5	0	8	8	5	3	5	0	0	0	7	0	42	0	858
Scelarcis perspicillata	9	NATRIX	23	15	5	0	20	5	3	3	0	0	0	0	9	0	45	0	855
Scelarcis perspicillata	10	NATRIX	45	17	9	0	40	16	1	8	4	0	0	0	12	0	86	0	814
Scelarcis perspicillata	11	NATRIX	92	10	4	0	78	5	3	0	0	0	0	0	6	0	24	0	876
Scelarcis perspicillata	12	NATRIX	102	10	3	0	96	8	4	0	4	0	0	0	7	0	65	0	835
Scelarcis perspicillata	13	NATRIX	50	17	9	0	61	15	4	3	5	0	0	0	9	0	75	0	825
Scelarcis perspicillata	14	NATRIX	152	75	18	0	284	27	7	97	81	0	0	0	30	0	293	0	607
Scelarcis perspicillata	15	NATRIX	17	10	2	0	77	17	5	3	6	0	0	0	5	0	42	0	858
Scelarcis perspicillata	16	NATRIX	3	17	11	0	4	10	6	9	4	0	0	0	12	0	77	0	823
Scelarcis perspicillata	17	NATRIX	5	28	14	0	190	13	2	3	4	0	0	0	16	0	101	0	799
Scelarcis perspicillata	18	NATRIX	17	8	4	0	15	5	3	1	0	0	0	0	3	0	22	0	878
Scelarcis perspicillata	19	NATRIX	82	22	15	0	80	22	1	1	15	0	0	0	21	0	160	0	740
Scelarcis perspicillata	20	NATRIX	7	16	6	0	12	18	4	6	6	0	0	0	16	0	72	0	828
Scelarcis perspicillata	21	NATRIX	190	29	17	0	180	21	6	22	14	0	0	0	17	0	170	0	730
Scelarcis perspicillata	22	NATRIX	14	10	5	0	12	5	3	4	1	0	0	0	7	0	49	0	851
Scelarcis perspicillata	23	NATRIX	71	19	7	0	68	12	3	7	7	0	0	0	18	0	60	0	840
Scelarcis perspicillata	24	NATRIX	62	41	23	0	58	16	13	14	16	0	0	0	29	0	185	0	715
Scelarcis perspicillata	1	MACROPROTODON	160	17	5	0	182	11	3	5	2	0	0	0	8	0	65	0	835
Scelarcis perspicillata	2	MACROPROTODON	15	33	11	0	240	12	26	21	21	0	0	0	11	0	124	0	776
Scelarcis perspicillata	3	MACROPROTODON	150	12	8	0	145	9	3	1	4	0	0	0	9	0	74	0	826
Scelarcis perspicillata	4	MACROPROTODON	170	18	8	0	180	10	7	3	8	0	0	0	12	0	92	0	808
Scelarcis perspicillata	5	MACROPROTODON	13	18	10	0	15	8	5	15	9	0	0	0	18	0	80	0	820
Scelarcis perspicillata	6	MACROPROTODON	42	22	12	0	40	13	2	5	15	0	0	0	7	0	90	0	810
Scelarcis perspicillata	7	MACROPROTODON	89	13	9	0	80	7	2	8	7	0	0	0	13	0	51	0	849
Scelarcis perspicillata	8	MACROPROTODON	45	7	4	0	40	3	2	2	1	0	0	0	3	0	30	0	870
Scelarcis perspicillata	9	MACROPROTODON	103	7	4	0	100	3	1	1	1	0	0	0	3	0	17	0	883
Scelarcis perspicillata	10	MACROPROTODON	464	13	3	0	468	40	0	0	14	0	0	0	2	0	44	0	856
Scelarcis perspicillata	11	MACROPROTODON	18	27	10	0	37	18	2	1	22	0	0	0	16	0	75	0	825
Scelarcis perspicillata	12	MACROPROTODON	56	28	9	0	13	46	16	2	21	0	0	0	22	0	94	0	806
Scelarcis perspicillata	13	MACROPROTODON	60	18	9	0	58	9	9	0	14	0	0	0	13	0	60	0	840
Scelarcis perspicillata	14	MACROPROTODON	14	7	3	0	11	3	1	1	1	0	0	0	2	0	17	0	883
Scelarcis perspicillata	15	MACROPROTODON	54	5	2	0	59	10	0	0	0	0	0	0	7	0	18	0	882
Scelarcis perspicillata	16	MACROPROTODON	48	18	9	0	71	18	8	4	4	0	0	0	19	0	78	0	822
Scelarcis perspicillata	17	MACROPROTODON	75	12	4	0	70	3	1	0	1	0	0	0	5	0	35	0	865
Scelarcis perspicillata	18	MACROPROTODON	92	3	4	0	89	13	0	0	0	0	0	0	0	0	15	0	885
Scelarcis perspicillata	19	MACROPROTODON	12	6	2	0	9	5	2	3	1	0	0	0	6	0	34	0	866
Scelarcis perspicillata	20	MACROPROTODON	9	19	7	0	36	21	3	3	3	0	0	0	23	0	76	0	824
Scelarcis perspicillata	21	MACROPROTODON	390	17	7	0	388	6	3	15	7	0	0	0	12	0	88	0	812
Scelarcis perspicillata	22	MACROPROTODON	72	18	11	0	69	8	3	3	11	0	0	0	6	0	105	0	795
Scelarcis perspicillata	23	MACROPROTODON	409	18	7	0	397	9	2	1	3	0	0	0	7	0	45	0	855
Scelarcis perspicillata	24	MACROPROTODON	75	30	16	0	75	7	5	3	4	0	0	0	14	0	90	0	810
Podarcis siculus	1	CONTROL	39	88	55	0	37	60	40	45	12	0	0	0	55	0	279	0	621
Podarcis siculus	2	CONTROL	40	110	39	0	42	108	37	148	24	0	0	0	40	0	380	0	520
Podarcis siculus	3	CONTROL	5	67	33	0	5	119	27	57	25	0	0	0	24	0	221	0	679
Podarcis siculus	4	CONTROL	30	89	43	0	6	179	43	64	57	0	0	0	33	0	302	0	598
Podarcis siculus	5	CONTROL	240	64	16	0	7	65	21	60	10	0	0	0	18	0	183	0	717
Podarcis siculus	6	CONTROL	9	108	46	0	2	194	28	50	16	0	0	0	19	0	368	0	532
Podarcis siculus	7	CONTROL	49	115	60	0	48	62	41	63	18	0	0	0	60	0	328	0	512
Podarcis siculus	8	CONTROL	95	63	18	0	90	121	17	30	18	0	0	0	14	0	158	0	742
Podarcis siculus	9	CONTROL	56	66	22	0	52	113	29	43	17	0	0	0	17	0	187	0	713
Podarcis siculus	10	CONTROL	42	51	11	0	39	71	8	31	11	0	0	0	26	0	150	0	750
Podarcis siculus	11	CONTROL	30	162	44	0	32	111	24	109	10	0	0	0	47	0	544	0	356
Podarcis siculus	12	CONTROL	36	134	47	0	38	93	26	202	67	0	2	0	51	0	517	0	383
Podarcis siculus	13	CONTROL	100	145	50	0	75	131	28	75	10	0	0	0	45	0	463	0	434
Podarcis siculus	14	CONTROL	13	119	49	0	14	68	42	85	5	0	0	0	59	0	339	0	561
Podarcis siculus	15	CONTROL	40	57	30	0	35	64	21	25	8	0	3	0	46	0	187	0	713
Podarcis siculus	16	CONTROL	60	56	8	0	55	39	12	45	2	0	0	0	10	0	147	0	743
Podarcis siculus	17	CONTROL	34	134	43	0	38	80	32	83	4	0	0	0	32	0	420	0	480
Podarcis siculus	18	CONTROL	123	213	59	0	120	118	35	202	58	0	21	0	52	0	696	0	204
Podarcis siculus	19	CONTROL	19	120	43	0	30	61	25	64	45	0	1	0	42	0	325	0	575
Podarcis siculus	20	CONTROL	196	71	23	0	192	101	8	74	20	0	0	0	46	0	233	0	667
Podarcis siculus	21	CONTROL	47	106	23	0	43	104	27	91	21	0	0	0	21	0	198	0	702
Podarcis siculus	22	CONTROL	21	85	47	0	81	70	49	103	6	0	0	0	47	0	308	0	592
Podarcis siculus	23	CONTROL	77	114	46	1	75	88	37	91	0	0	0	0	50	0	387	3	510
Podarcis siculus	24	CONTROL	20	130	56	0	16	72	60	34	9	0	0	0	75	0	380	0	520
Podarcis siculus	1	RHINECHIS	55	110	52	0	65	73	38	59	6	0	0	0	49	0	302	0	598
Podarcis siculus	2	RHINECHIS	9	50	13	0	5	63	5	69	0	0	1	0	12	0	165	0	735
Podarcis siculus	3	RHINECHIS	225	8	4	22	228	51	0	20	5	0	0	0	8	0	45	45	810
Podarcis siculus	4	RHINECHIS	5	64	28	3	28	149	44	54	26	0	0	0	21	0	217	26	657
Podarcis siculus	5	RHINECHIS	75	129	31	0	69	154	32	113	13	0	0	0	17	0	333	0	567
Podarcis siculus	6	RHINECHIS	37	80	29	0	7	135	33	31	19	0	0	0	20	0	194	0	706
Podarcis siculus	7	RHINECHIS	7	145	72	0	8	74	23	68	28	0	0	0	45	0	411	0	489
Podarcis siculus	8	RHINECHIS	194	42	18	24	192	224	8	2	19	0	0	0	14	0	91	37	772
Podarcis siculus	9	RHINECHIS	98	39	14	11	95	144	32	16	4	0	0	0	9	0	101	45	754
Podarcis siculus	10	RHINECHIS	50	95	32	0	30	115	49	75	12	0	0	0	40	0	280	0	620
Podarcis siculus	11	RHINECHIS	20	101	38	12	25	119	39	88	5	0	0	0	44	0	253	76	571
Podarcis siculus	12	RHINECHIS	22	206	93	23	20	139	27	268	45	0	0	0	70	0	567	55	178
Podarcis siculus	13	RHINECHIS	51	74	23	8	53	96	28	54	12	0	0	0	39	0	179	29	698
Podarcis siculus	14	RHINECHIS	13	83	33	0	30	57	41	64	8	0	0	0	52	0	290	0	610
Podarcis siculus	15	RHINECHIS	41	84	37	0	38	63	30	92	17	0	5	0	72	0	314	0	586
Podarcis siculus	16	RHINECHIS	32	46	16	0	34	35	37	48	0	0	0	0	14	0	395	0	505
Podarcis siculus	17	RHINECHIS	98	104	33	3	63	84	24	71	10	0	1	0	19	0	251	5	644
Podarcis siculus	18	RHINECHIS	28	163	50	0	27	102	32	137	36	0	9	0	44	0	608	0	292
Podarcis siculus	19	RHINECHIS	40	86	30	5	46	50	25	50	25	0	0	0	22	0	257	8	635
Podarcis siculus	20	RHINECHIS	73	41	25	9	15	60	12	17	20	0	0	0	8	3	215	12	673
Podarcis siculus	21	RHINECHIS	7	193	69	0	3	100	19	225	28	0	1	0	45	0	603	0	297
Podarcis siculus	22	RHINECHIS	54	65	23	0	55	48	27	54	7	0	0	0	44	0	230	0	670
Podarcis siculus	23	RHINECHIS	41	100	43	5	38	58	25	54	3	0	0	0	57	0	353	15	532
Podarcis siculus	24	RHINECHIS	8	121	47	0	5	90	50	89	15	0	0	0	62	0	310	0	590
Podarcis siculus	1	NATRIX	42	85	42	0	42	53	33	43	9	0	0	0	39	0	239	0	661
Podarcis siculus	2	NATRIX	4	58	22	0	63	69	15	31	34	0	0	0	22	0	178	0	722
Podarcis siculus	3	NATRIX	62	40	7	0	2	54	3	7	20	0	0	0	8	0	82	0	818
Podarcis siculus	4	NATRIX	82	24	6	0	62	53	20	18	20	0	0	0	6	0	104	0	796
Podarcis siculus	5	NATRIX	88	102	21	0	53	117	34	35	11	0	0	0	12	0	204	0	696
Podarcis siculus	6	NATRIX	7	175	48	0	3	228	47	142	9	0	0	0	40	0	498	0	402
Podarcis siculus	7	NATRIX	61	105	50	5	60	95	38	63	17	0	0	0	48	0	337	0	563
Podarcis siculus	8	NATRIX	84	105	25	0	7	134	17	29	8	0	0	0	15	0	322	0	578
Podarcis siculus	9	NATRIX	78	107	16	0	12	116	13	21	15	0	0	0	10	0	171	0	729
Podarcis siculus	10	NATRIX	57	170	63	0	15	102	32	109	35	0	0	0	28	0	456	0	444
Podarcis siculus	11	NATRIX	34	150	45	0	27	105	30	160	12	0	0	0	46	0	510	0	390
Podarcis siculus	12	NATRIX	5	155	58	0	2	74	11	160	22	0	0	0	47	0	439	0	451
Podarcis siculus	13	NATRIX	50	101	41	0	8	47	31	89	8	0	0	0	25	0	281	0	619
Podarcis siculus	14	NATRIX	7	132	52	0	5	75	19	79	13	0	0	0	63	0	334	0	566
Podarcis siculus	15	NATRIX	40	67	31	0	35	61	26	50	10	0	4	0	45	0	217	0	683
Podarcis siculus	16	NATRIX	45	137	41	0	47	43	22	88	10	0	0	0	22	0	320	0	580
Podarcis siculus	17	NATRIX	36	127	44	0	35	81	37	140	6	0	0	0	28	0	360	0	540
Podarcis siculus	18	NATRIX	102	175	53	0	85	104	34	125	54	0	12	0	58	0	522	0	378
Podarcis siculus	19	NATRIX	50	114	33	0	48	98	48	83	44	0	0	0	49	0	365	0	535
Podarcis siculus	20	NATRIX	87	65	27	0	89	77	27	66	18	0	0	0	10	0	188	0	712
Podarcis siculus	21	NATRIX	175	106	33	0	172	163	34	144	29	0	4	0	47	0	466	0	434
Podarcis siculus	22	NATRIX	14	93	54	0	85	65	44	99	5	0	0	0	53	0	345	0	555
Podarcis siculus	23	NATRIX	65	120	51	0	80	90	35	92	3	0	0	0	46	0	390	0	510
Podarcis siculus	24	NATRIX	13	159	63	0	13	74	68	120	12	0	0	0	83	0	434	0	466
Podarcis siculus	1	MACROPROTODON	119	23	9	61	118	91	30	75	2	0	0	0	39	3	83	174	643
Podarcis siculus	2	MACROPROTODON	109	51	10	14	102	55	12	74	5	0	0	0	25	0	170	72	658
Podarcis siculus	3	MACROPROTODON	165	14	6	18	172	49	5	50	15	0	0	0	8	4	102	45	753
Podarcis siculus	4	MACROPROTODON	62	47	17	19	52	173	15	73	0	0	0	0	11	0	160	46	694
Podarcis siculus	5	MACROPROTODON	320	0	0	29	315	112	11	66	0	1	0	0	6	0	0	95	805
Podarcis siculus	6	MACROPROTODON	137	0	0	16	114	176	7	6	0	0	0	0	5	3	0	73	827
Podarcis siculus	7	MACROPROTODON	127	16	8	52	125	139	18	43	8	0	0	0	55	0	80	189	731
Podarcis siculus	8	MACROPROTODON	168	9	3	42	162	76	3	3	19	0	0	0	7	0	26	109	765
Podarcis siculus	9	MACROPROTODON	136	15	4	29	132	73	17	6	12	0	0	0	7	0	42	75	783
Podarcis siculus	10	MACROPROTODON	25	34	17	64	19	154	32	98	6	0	0	0	38	6	113	245	542
Podarcis siculus	11	MACROPROTODON	192	27	10	44	187	86	19	89	0	0	0	0	24	3	69	187	644
Podarcis siculus	12	MACROPROTODON	132	71	24	39	103	78	19	110	0	0	0	0	27	0	189	109	702
Podarcis siculus	13	MACROPROTODON	322	11	5	36	307	89	14	78	9	0	0	0	10	0	44	136	740
Podarcis siculus	14	MACROPROTODON	59	29	13	41	45	68	30	40	0	0	0	0	57	8	89	122	689
Podarcis siculus	15	MACROPROTODON	108	35	17	38	97	58	18	42	3	0	5	0	38	3	98	149	653
Podarcis siculus	16	MACROPROTODON	62	0	0	26	56	31	9	6	0	0	0	0	0	17	0	75	825
Podarcis siculus	17	MACROPROTODON	57	71	28	24	37	117	9	58	21	0	0	0	26	0	119	129	552
Podarcis siculus	18	MACROPROTODON	245	60	23	45	242	99	30	164	16	0	10	0	33	3	284	161	455
Podarcis siculus	19	MACROPROTODON	216	33	12	25	217	101	16	79	10	0	1	0	29	0	102	114	684
Podarcis siculus	20	MACROPROTODON	352	5	2	24	340	108	4	51	0	3	0	0	14	12	17	91	792
Podarcis siculus	21	MACROPROTODON	67	65	13	11	65	84	24	105	12	0	0	0	12	0	249	30	621
Podarcis siculus	22	MACROPROTODON	40	41	20	30	35	70	34	90	0	0	0	0	21	1	170	60	670
Podarcis siculus	23	MACROPROTODON	25	24	13	46	24	63	19	69	23	0	0	0	32	8	90	155	645
Podarcis siculus	24	MACROPROTODON	192	9	4	51	151	70	22	71	8	1	0	0	52	11	32	128	740
